# Supplementary material for: Synthesis and characterization of nona- and trideca-nuclear manganese phosphonate clusters
Source: Royal Society of Chemistry journal article supplement (doi:10.1039/b804532a), 2008-01-01
Supplement: b804532a.pdf [file b804532a.pdf]

## Supporting Information

### Synthesis and characterization of nona- and trideca-nuclear manganese phosphonate clusters

Mei Wang, Chengbing Ma and Changneng Chen\*

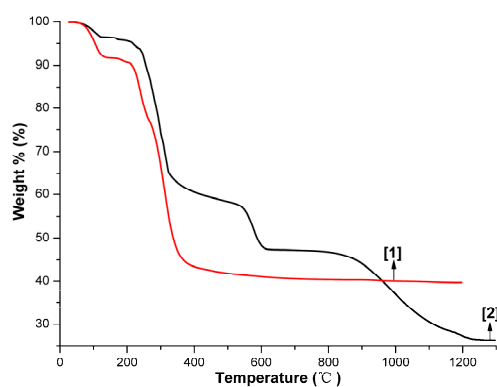

**Fig. S1** The TG curves of complexes **1** and **2**.

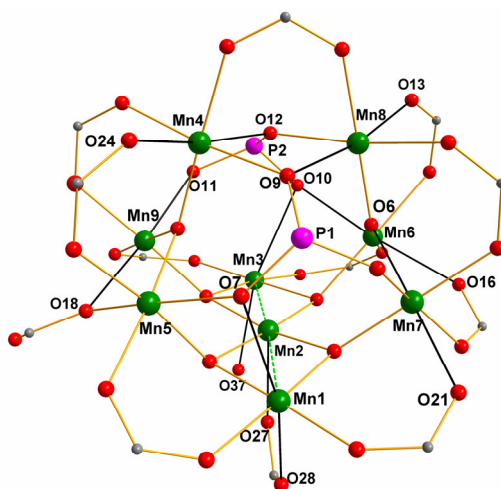

**Fig. S2** The structure of compound **1**. The Jahn-Teller elongated axes of the nine Mn(III) ions are highlighted in black. Color code: green, Mn; purple, P; red, O; gray, C. Hydrogen atoms and carbon atoms except those attached to the oxygen atoms have been omitted for clarity.

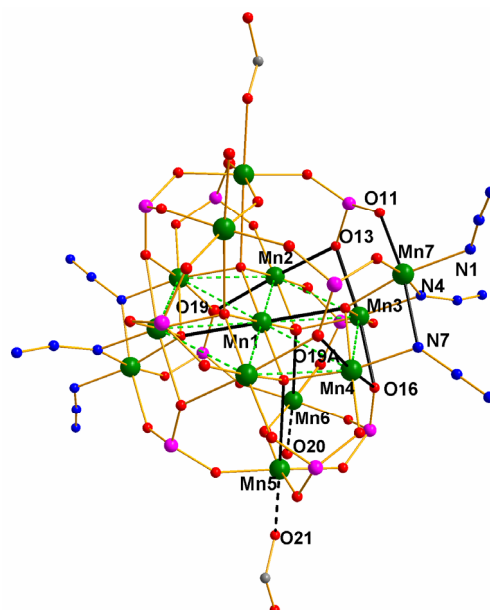

**Fig. S3** The structure of compound **2**. The Jahn-Teller elongated axes of the thirteen Mn(III) ions are highlighted in black. Color code: green, Mn; purple, P; red, O; gray, C. Hydrogen atoms and carbon atoms except those attached to the oxygen atoms have been omitted for clarity.

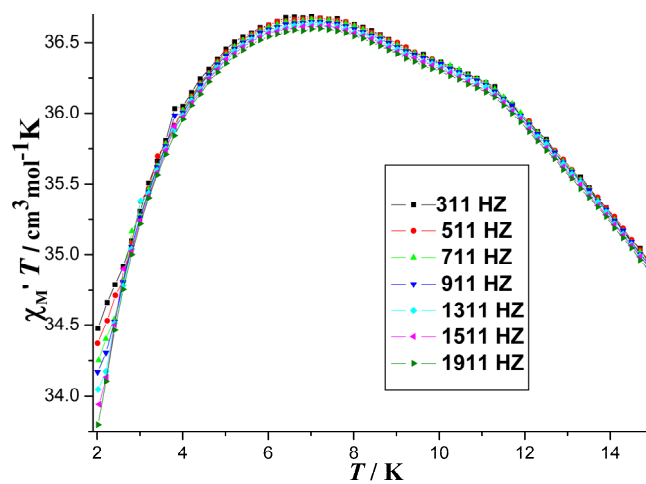

**Fig. S4** In-phase ( $\chi_M' T$ ) AC susceptibility versus  $T$  for complex **1** measured in a 3.0 G AC field oscillating at the indicated frequencies and in the temperature rang of 2-15 K.

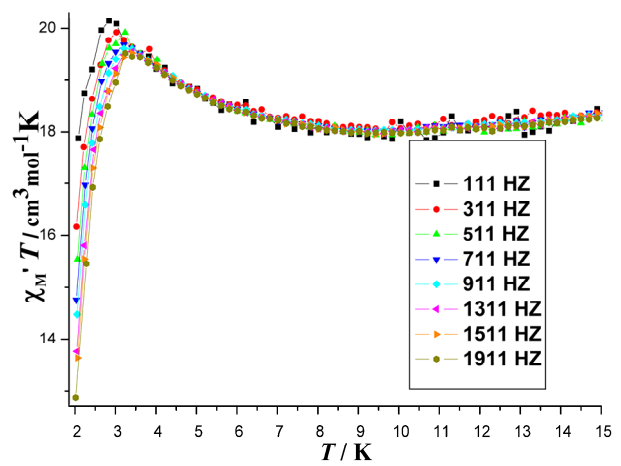

**Fig. S5** In-phase ( $\chi_M' T$ ) AC susceptibility versus  $T$  for complex **2** measured in a 3.0 G AC field oscillating at the indicated frequencies and in the temperature rang of 2-15 K.
